# Supplementary material
Source: publisher site journal article supplement (https://www.dovepress.com/article/500795)

Supplementary Table 1. The baseline in training set and validation set.

| Variable | Training set(n=8724) | validation set(n=3740) | Total (n=12464) | *p* |
| --- | --- | --- | --- | --- |
| Male, n (%) | 4756(54.5) | 2036(54.4) | 6792(54.5) | 0.952 |
| Age (yr), median [IQR] | 69(67,74) | 69(67,74) | 69(67,74) | 0.464 |
| BMI (kg/m2), median [IQR] | 24.3(22.14,26.62) | 24.29(22.06,26.57) | 24.3(22.13,26.58) | 0.300 |
| Smoking status, n (%) |  |  |  | 0.931 |
| Never smoker | 6457(74) | 2778(74.3) | 9235(74.1) |  |
| Current smoker | 1098(12.6) | 470(12.6) | 1568(12.6) |  |
| Former smoker | 1169(13.4) | 492(13.2) | 1661(13.3) |  |
| Drinking status, n(%) |  |  |  | 0.959 |
| Never drinker | 6634(76) | 2844(76) | 9478(76) |  |
| Current drinker | 1414(16.2) | 611(16.3) | 2025(16.2) |  |
| Former drinker | 676(7.7) | 285(7.6) | 961(7.7) |  |
| **Previous history; n (%)** |  |  |  |  |
| Hypertension | 4019(46.1) | 1706(45.6) | 5725(45.9) | 0.656 |
| Cerebrovascular diseases | 687(7.9) | 289(7.7) | 976(7.8) | 0.807 |
| Diabetes (need interventions) | 1967(22.5) | 855(22.9) | 2822(22.6) | | 0.718 | | --- | |
| Coronary heart disease | 1076(12.3) | 470(12.6) | 1546(12.4) | 0.740 |
| Cardiac interventions | 315(3.6) | 119(3.2) | 434(3.5) | 0.253 |
| Arrhythmia | 954(10.9) | 423(11.3) | 1377(11) | 0.562 |
| Valvular heart disease | 41(0.5) | 20(0.5) | 61(0.5) | 0.738 |
| Heart failure | 29(0.3) | 6(0.2) | 35(0.3) | 0.139 |
| Peripheral vessel stenosis | 188(2.2) | 77(2.1) | 265(2.1) | 0.785 |
| **Preoperative laboratory data** |  |  |  |  |
| White cell(109), median [IQR] | 5.9(4.89,7.13) | 5.88(4.89,7.13) | 5.9(4.89,7.13) | 0.832 |
| Hgb(g/L), median [IQR] | 131(120,142) | 131(119,141) | 131(120,142) | 0.151 |
| SCr (umol/L), median [IQR] | 71.7(61.2,83.7) | 71.5(60.9,83.6) | 71.6(61.1,83.7) | 0.456 |
| FB( g/L), median [IQR] | 3.32(2.84,3.95) | 3.32(2.83,3.95) | 3.32(2.84,3.95) | 0.743 |
| SII, Median (IQR) | 411.88(285.62,621.73) | 418.50(283.91,619.50) | 413.35(285,621.38) | 0.497 |
| NLR, Median (IQR) | 2(1.47,2.82) | 1.97(1.47,2.82) | 2(1.47,2.82) | 0.542 |
| PLR, Median (IQR) | 700(529.61,962.50) | 711.60(533.33,968.56) | 703.571(530.72,964.90) | 0.183 |
| **Surgery-related factors** |  |  |  |  |
| ASA classification, n (%) |  |  |  | 0.804 |
| Ⅰ | 88(1) | 34(0.9) | 122(1) |  |
| Ⅱ | 6900(79.1) | 2965(79.3) | 9865(79.1) |  |
| Ⅲ | 1660(19) | 714(19.1) | 2374(19) |  |
| Ⅳ | 76(0.9) | 27(0.7) | 103(0.8) |  |
| Surgery situation |  |  |  | 0.562 |
| Elective surgery | 8521(97.7) | 3660(97.9) | 12181(97.7) |  |
| Emergency surgery | 203(2.3) | 80(2.1) | 283(2.3) |  |
| Surgery type |  |  |  | 0.07 |
| Head and neck | 1369(15.7) | 620(16.6) | 1989(16) |  |
| Thorax and vessel | 1079(12.4) | 438(11.7) | 1517(12.2) |  |
| Abdomen | 3613(41.4) | 1512(40.4) | 5125(41.1) |  |
| Limbs and spine | 1705(19.5) | 794(21.2) | 2499(20) |  |
| Others | 958(11) | 376(10.1) | 1334(10.7) |  |
| Surgery duration (min), median [IQR] | 145(93,210) | 145(94,213) | 145(93,210) | 0.342 |
| Crystalloid infusion (ml),median (IQR) | 1600(1100,2100) | 1600(1100,2100) | 1600(1100,2100) | 0.739 |
| Colloid infusion (ml),median (IQR) | 500(0,500) | 500(0,500) | 500(0,500) | 0.382 |
| Urine volume (ml),median (IQR) | 250(100,600) | 300(100,600) | 250(100,600) | 0.671 |
| Blood loss (ml),median (IQR) | 2788(32) | 1234(33) | 4022(32.3) | 0.265 |
| Duration of intraoperative MAP<65mmHg,median [IQR] | 5.5(0.5,14.5) | 5.5(0.5,14.5) | 5.5(0.5,14.5) | 0.962 |
| intraoperative blood transfusion,n(%) | 891(10.2) | 375(10) | 1266(10.2) | 0.778 |

Abbreviation:BMI= Body Mass Index; Hgb= Hemoglobin; SCr= Serum creatinine; FB= fibrinogen; NLR=neutrophil-to-lymphocyte ratio; PLR=platelet-to-lymphocyte ratio; SII=systemic immune-inflammation index; ASA= American Society of Anesthesiologists; MAP=mean arterial pressure.

Supplementary Table 2. Univariate and Multivariate Logistic Analyses in new model.

| Covariates | Univariate | | | Multivariable | |
| --- | --- | --- | --- | --- | --- |
| OR(95% CI) | | P value | OR(95% CI) | P value |
| Sex | | 0.85(0.73-1.002) | 0.054 | 0.99(0.79--1.25) | 0.956 |
| Age | | 1.09(1.08-1.10) | <0.001 | 1.07(1.05-1.09) | <0.001 |
| BMI | | 0.95(0.93-0.97) | <0.001 | 0.98(0.95-1.00) | 0.069 |
| Smoking status | |  |  |  |  |
| Current smoker | | 0.78(0.59-1.01) | 0.065 | 0.75(0.54-1.04) | 0.093 |
| Former smoker | | 1.09(0.86-1.36) | 0.462 | 0.99(0.72-1.33) | 0.932 |
| Drinking status | |  |  |  |  |
| Current drinker | | 0.81(0.64-1.01) | 0.070 | 0.89(0.66-1.20) | 0.454 |
| Former drinker | | 1.02(0.75-1.36) | 0.887 | 0.85(0.58-1.23) | 0.404 |
| Hypertension | | 1.41(1.20-1.66) | <0.001 | 1.15(0.95-1.39) | 0.159 |
| Cerebrovascular diseases | | 2.37(1.88-2.97) | <0.001 | 1.83(1.40-2.39) | <0.001 |
| Diabetes (need interventions) | | 1.60(1.35-1.91) | <0.001 | 1.29(1.06-1.57) | 0.012 |
| Coronary heart disease | | 2.52(2.07-3.04) | <0.001 | 1.70(1.29-2.21) | <0.001 |
| Cardiac interventions | | 2.77(2.03-3.72) | <0.001 | 1.29(0.85-1.95) | 0.229 |
| Arrhythmia | | 2.03(1.64-2.49) | <0.001 | 1.42(1.11-1.81) | 0.005 |
| Valvular heart disease | | 1.73(0.59-4.03) | 0.255 | 1.76(0.53-4.73) | 0.300 |
| Heart failure | | 17.98(8.61-38.74) | <0.001 | 4.53(1.91-11.03) | <0.001 |
| Peripheral vessel stenosis | | 2.12(1.37-3.16) | <0.001 | 1.97(1.15-3.29) | 0.011 |
| White cell | | 1.13(1.10-1.16) | <0.001 | 1.02(0.98-1.06) | 0.307 |
| Hgb | | 0.97(0.96-0.97) | <0.001 | 0.98(0.979-0.989) | <0.001 |
| SCr | | 1.01(1.01-1.02) | <0.001 | 1.92(1.56-2.36) | <0.001 |
| FB | | 1.41(1.32-1.50) | <0.001 | 1.05(0.97-1.15) | 0.219 |
| SII | | 2.70(2.29-3.17) | <0.001 | 1.21(0.76-1.94) | 0.416 |
| NLR | | 3.08(2.62-3.62) | <0.001 | 1.54(1.20-1.97) | <0.001 |
| PLR | | 2.52(2.14-2.96) | <0.001 | 0.86(0.55-1.32) | 0.487 |
| ASA classification | |  |  |  |  |
| Ⅱ | | 0.85(0.38-2.44) | 0.731 | 0.56(0.24-1.63) | 0.222 |
| Ⅲ | | 3.20(1.42-9.15) | 0.012 | 1.09(0.46-3.22) | 0.859 |
| Ⅳ | | 20.51(8.10-63.33) | <0.001 | 3.67(1.31-12.18) | 0.020 |
| Emergency surgery | | 4.80(3.45-6.59) | <0.001 | 2.79(1.78-4.33) | <0.001 |
| Surgery site | |  |  |  |  |
| Head and neck | | 1.42(0.93-2.21) | 0.112 | 2.12(1.31-3.47) | 0.002 |
| Thorax and vessel | | 1.86(1.21-2.89) | 0.005 | 2.36(1.46-3.88) | < 0.001 |
| Abdomen | | 3.10(2.18-4.58) | < 0.001 | 2.68(1.82-4.06) | <0.001 |
| Limbs and spine | | 2.61(1.79-3.93) | < 0.001 | 2.93(1.90-4.64) | <0.001 |
| Surgery duration | | 1.005(1.005-1.006) | <0.001 | 1.00(1.00-1.01) | <0.001 |
| Crystalloid infusion | | 1.001(1.001-1.001) | <0.001 | 1.00(1.00-1.00) | <0.001 |
| | Colloid infusion | | --- | | | 1.001(1.001-1.001) | <0.001 | 1.00(1.00-1.001) | <0.001 |
| Urine volume | | 1.00(.001-1.001) | <0.001 | 0.999(0.999-1) | 0.003 |
| Blood loss | | 2.57(2.19-3.02) | <0.001 | 1.19(0.95-1.49) | 0.134 | |
| Duration of intraoperative MAP<65 | | 1.006(1.005-1.007) | <0.001 | 1.00(1-1.004) | 0.023 | |
| Intraoperative blood transfusion | | 4.17(3.46-5.02) | <0.001 | 1.37(1.06-1.77) | 0.014 | |

Abbreviation:BMI= Body Mass Index; Hgb= Hemoglobin; SCr= Serum creatinine; FB= fibrinogen; NLR=neutrophil-to-lymphocyte ratio; PLR=platelet-to-lymphocyte ratio; SII=systemic immune-inflammation index; ASA= American Society of Anesthesiologists; MAP=mean arterial pressure.

Supplementary Figure 1. Subgroup analysis of the association between NLR, PLR, SII and MINS in different groups based sex, ASA classification, surgery duration, blood loss, surgery situation and surgery type.


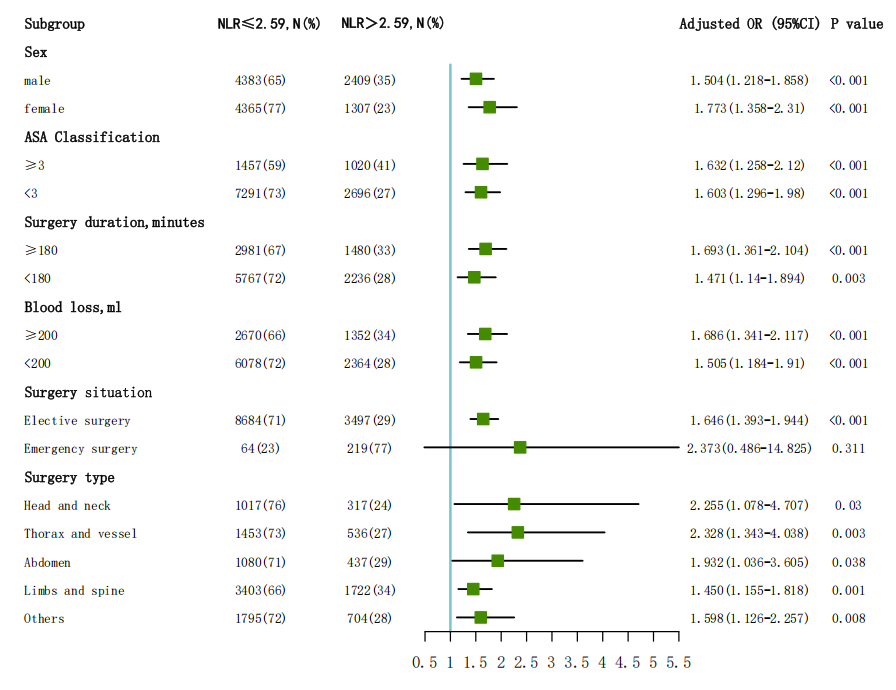


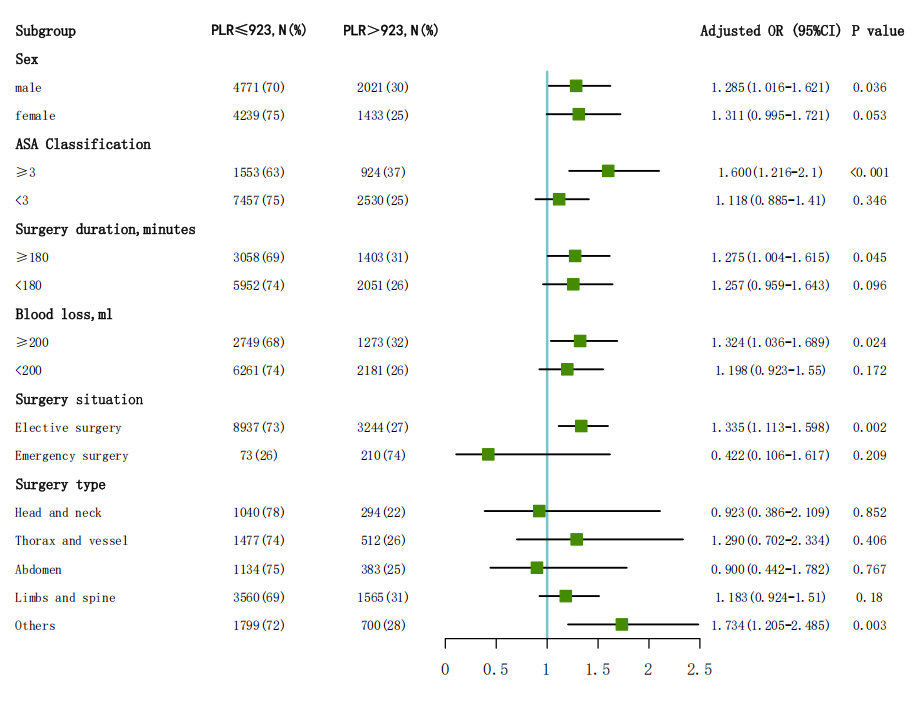


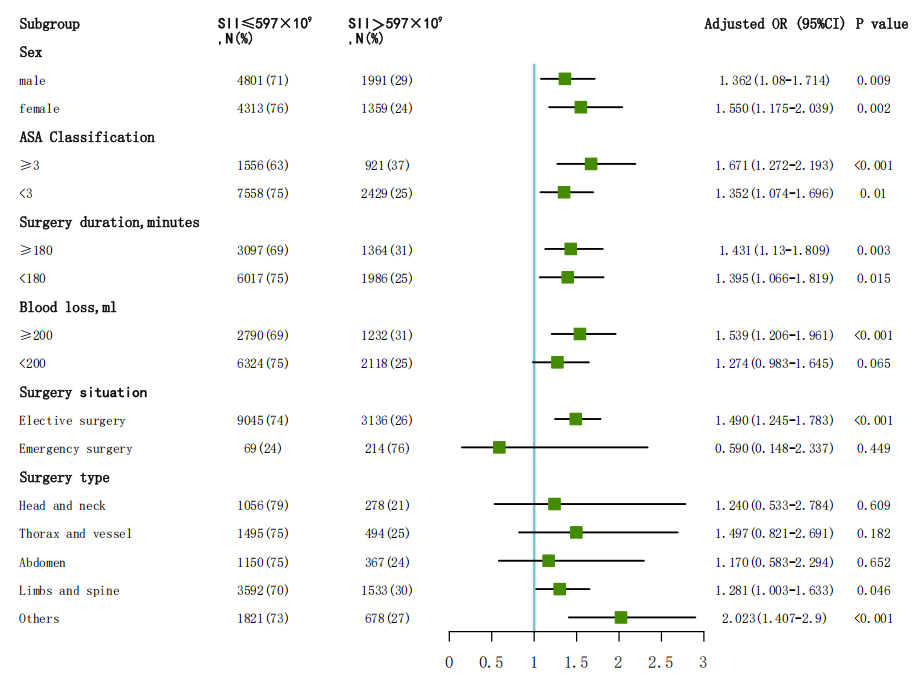

Supplement: Supplementary file 1 [file get_supplementary_file.php]
